# Supplementary material
Source: PubMed Central journal article supplement (PMC1201353)
Supplement: 7600772s1.pdf [file 7600772s1.pdf]

## Supplementary Figure 1

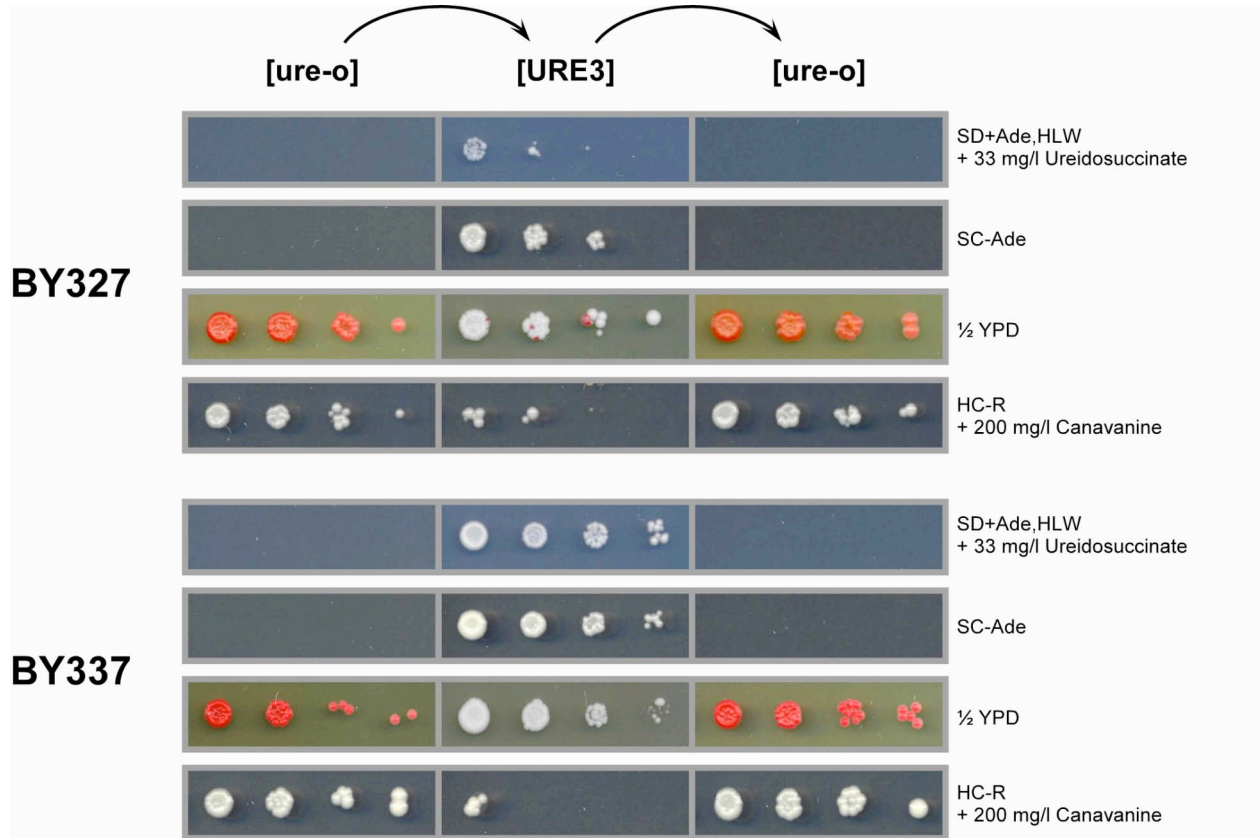

Comparison of [URE3] in different strains with the same reporter constructs. Strains BY327 and BY337 lacking [URE3] ("[ure-o]") were converted to [URE3] by cytoduction from strains 1735 and 3310, respectively ("[URE3]"). These cytoductants were cured of [URE3] by 3 days growth on 1/2 YPD plates containing 3 mM guanidine ("[ure-o]"). Serial 10-fold dilutions were spotted on the indicated media and incubated at 30°C for 3 days. Note the differences in USA<sup>+</sup> phenotype (on plates with ureidosuccinate) between the two strains and the appearance of red adenine auxotroph [ure-o] revertants among the white [URE3] colonies in strain BY327 (on 1/2 YPD plates).
