# Supplementary material
Source: PubMed Central journal article supplement (PMC1201353)
Supplement: 7600772s3.pdf [file 7600772s3.pdf]

### Supplementary Figure 3

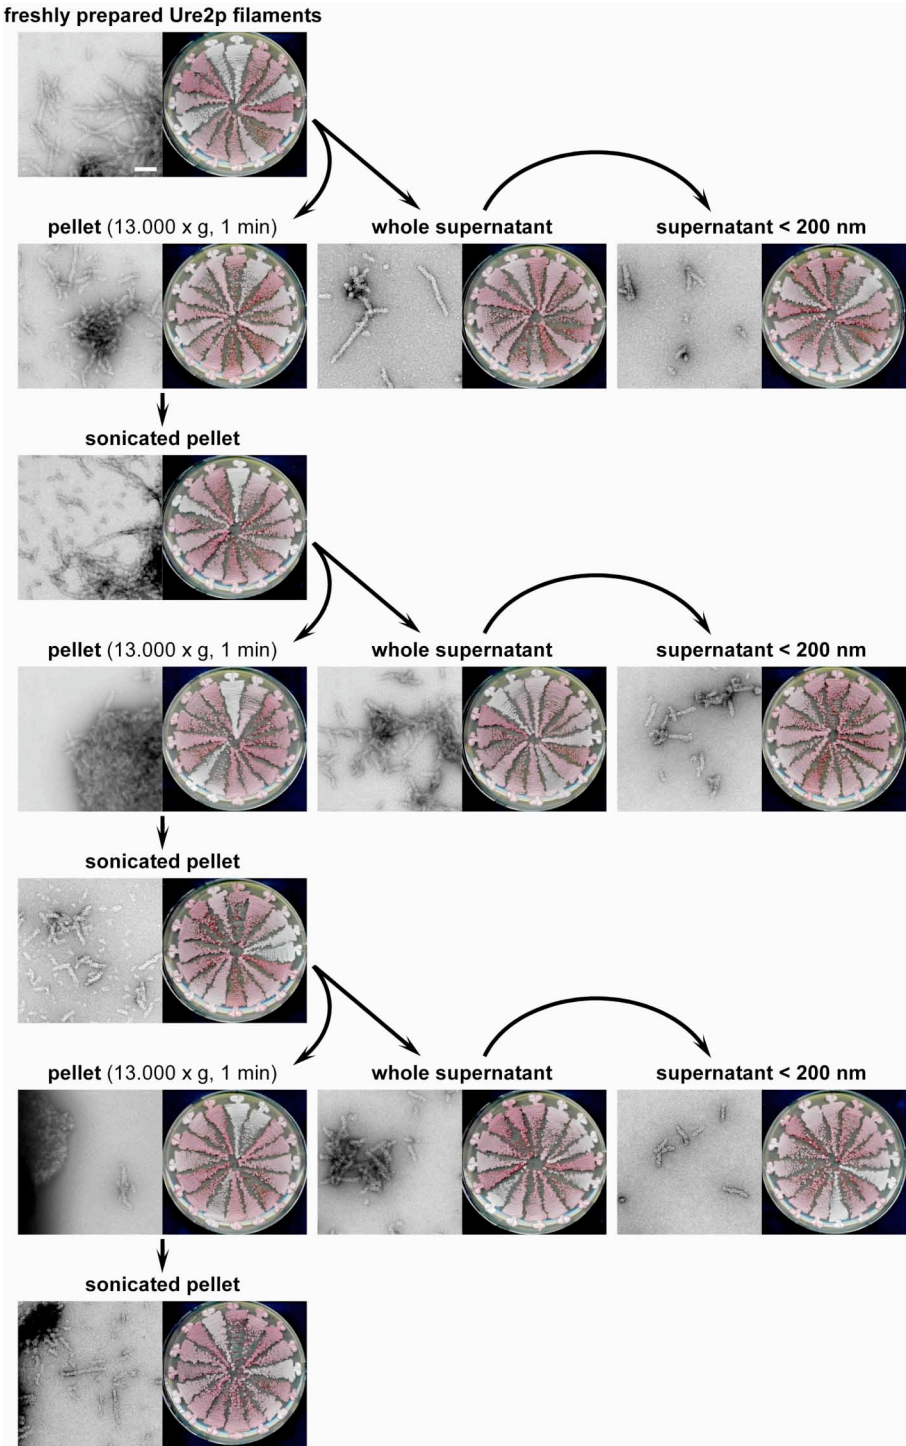

Electron micrographs of negative stained filament fractions and [URE3] variant spectrum of transformants described in Figure 2G. Randomly chosen clones were streaked on 1/2 YPD plates

and incubated at 30°C for 5 days. In < 20 nm fractions, no material could be observed by EM, and these fractions did not give rise to transformants. Note that although the various fractions exhibited marked differences in filament size, all gave rise to the same spectrum of [URE3] variants. Bar, 100 nm.
