# Supplementary material
Source: PubMed Central journal article supplement (PMC1201353)
Supplement: 7600772s4.pdf [file 7600772s4.pdf]

## Supplementary Figure 4

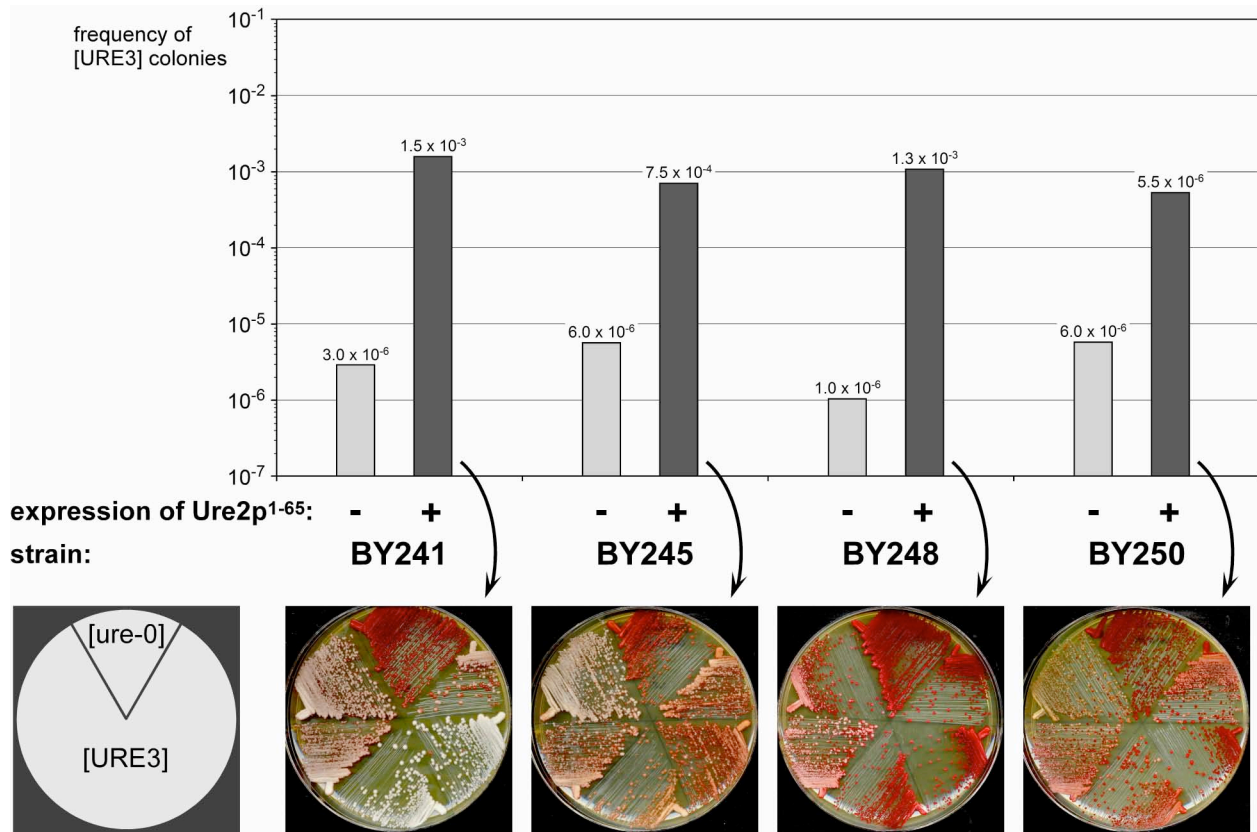

Induction of [URE3] by transient overexpression of Ure2p<sup>1-65</sup>. Prion generation was performed as previously described (Ross et al, 2004), with plasmid pER63 in the indicated strains. Plasmid pH317 served as negative control. Strains were grown for 3 days at 30°C in HC-L liquid medium containing 2% raffinose and 1% galactose instead of glucose as the carbon source. Serial 10-fold dilutions were then plated onto SC-Ade plates to select for [URE3] cells. Five randomly chosen clones from the overexpression experiments and one [ure-o] clone were streaked on 1/2 YPD plates and incubated at 30°C for 4 days. Note the appearance of different [URE3] variants in all four strains tested.
