# Supplementary material
Source: PubMed Central journal article supplement (PMC1201353)
Supplement: 7600772s5.pdf [file 7600772s5.pdf]

## Supplementary Figure 5

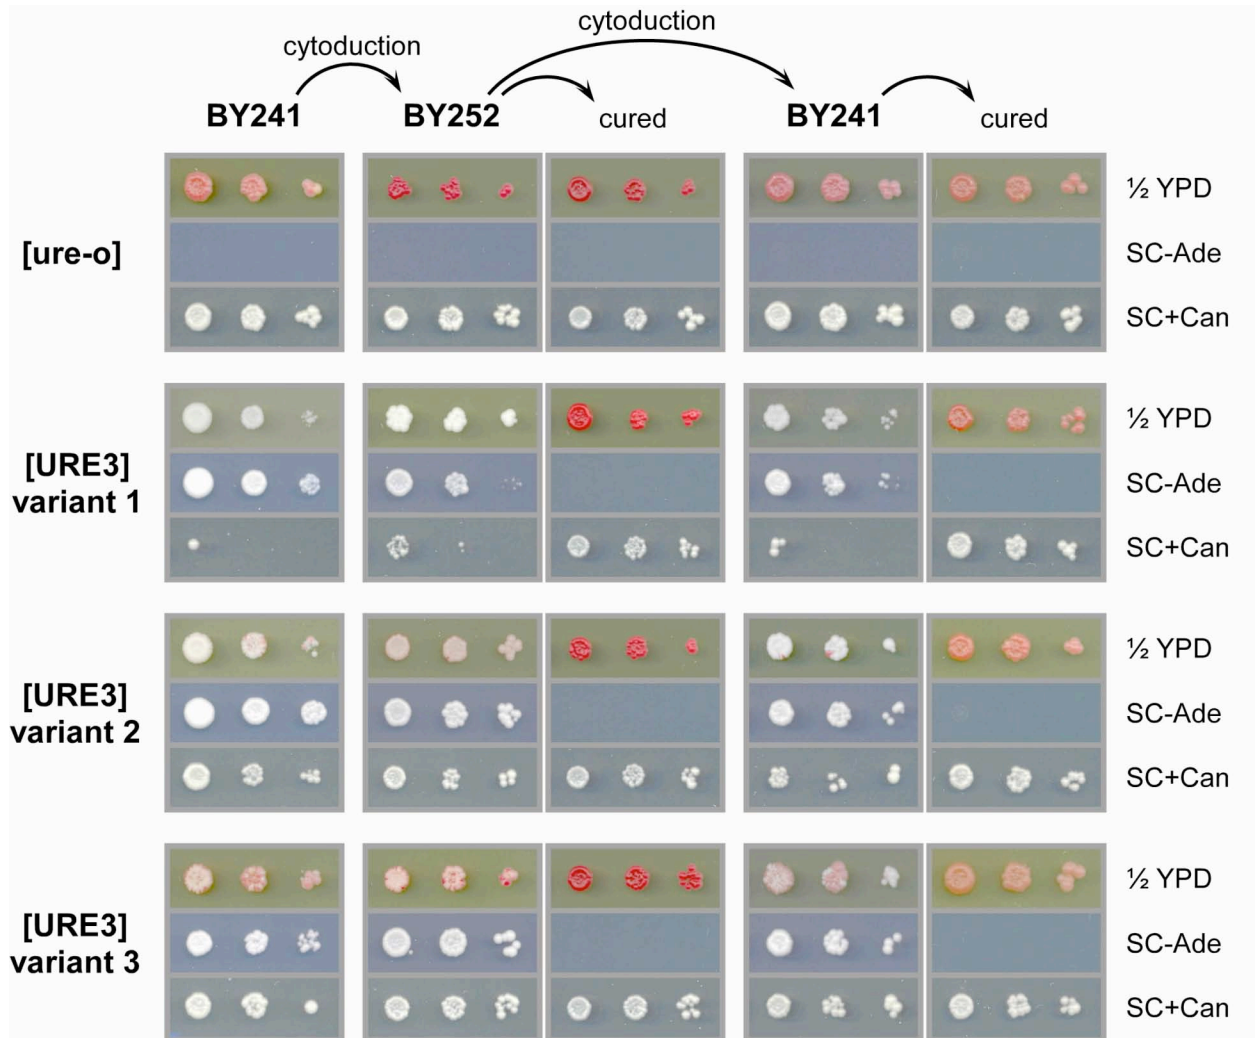

Conservation of variant characteristics upon [URE3] transmission. Cytoplasm of BY241 strains with either [ure-o] or three different [URE3] variants was transferred to BY252 by cytoduction and then back into BY241. Recipient clones were cured of [URE3] by growth on 1/2 YPD plates containing 3 mM guanidinium to demonstrate reversion to [ure-o] in all cases. Serial 10-fold dilutions were spotted on the indicated media and incubated at 30°C for 3 days (1/2 YPD and SC+Can) or 5 days (SC-Ade). Note the differences in color on 1/2 YPD plates and sensitivity to canavanine between the three [URE3] variants and between the two strains.
