# Supplementary material
Source: PubMed Central journal article supplement (PMC1201353)
Supplement: 7600772s7.pdf [file 7600772s7.pdf]

## Supplementary Table I

### Oligonucleotides used in this study

| Name   | Sequence (5' → 3')                                                                                                 |
|--------|--------------------------------------------------------------------------------------------------------------------|
| OAB40  | ACT GGC AAG TGC GTA TAA ATT AAA CCT ATT TCT TTA TCA TCA TAT TTA CTC<br>CAT GGT GGA TCC CGG CGG                     |
| OAB41  | TTG TAC ATA TGC TTC TCC TCT ATG TCG GCG TCT TCT TTT GAA TTT GTC ATC<br>TTG AAT TTT TTT TTT TAC ACT ATT TGA TTA TCC |
| OAB128 | TTT TGT TAT TAG TCA TAT TGT TTT AAG CTG CAA ATT AAG TTG TAC ACC AAC<br>GTA CGC TGC AGG TCG AC                      |
| OAB129 | ATA ACC TTC TTT TCC TCC TTC TTC TTT CTT TCT TGT TTT TAA AGC AGC CTA<br>TCG ATG AAT TCG AGC TCG                     |
| OAB115 | AGT ATA TCA TCT CAT TTC CGT AAA TAC CAA ATG TAT TAT ATA TTG AAA GCG<br>GAT CCC GGC GGA TTT TTC TTT CTT ATT GCA CC  |
| OAB116 | GCC GCC TTA TAT GAA CTG TAT CG                                                                                     |
| ub15   | ATT ACA TAT GCA TCA CCA TCA CCA TCA CAT GAT GAA TAA CAA CGG C                                                      |
| ub18   | ATA TCT CGA GTT ACA GCA CTG CCA CAA TC                                                                             |
| ub20   | GCG GCC GCT TGC CTG TTG TTG TTG TCG ATG                                                                            |
| ub21   | CAG GCA AGC GGC CGC ATG TTT GAG AAC ATT ACC                                                                        |
